# Adenosine and a Nitric Oxide Donor Enhances Cardioprotection by Preconditioning with Isoflurane through Mitochondrial Adenosine Triphosphate-sensitive $K^+$ Channel-dependent and -independent Mechanisms

Mayu Wakeno-Takahashi, M.D.,\* Hajime Otani, M.D.,† Shinichi Nakao, M.D.,‡ Yuka Uchiyama, M.D.,\* Hiroji Imamura, M.D.,§ Koh Shingu, M.D.||

**Background:** Preconditioning with isoflurane has been shown to confer cardioprotection *via* activation of mitochondrial adenosine triphosphate-sensitive  $K^+$  (mito  $K_{ATP}$ ) channels. However, the relative contribution of mito  $K_{ATP}$  channel and non-mito  $K_{ATP}$  channel mechanisms to isoflurane-mediated cardioprotection has not been investigated.

**Methods:** Isolated and buffer-perfused rat hearts were used. Flavoprotein fluorescence was monitored as an index for mito  $K_{ATP}$  channel activity. Isovolumic left ventricular function and infarct size were measured as indices for cardioprotection.

**Results:** Flavoprotein fluorescence, which was monitored as an index for mito  $K_{ATP}$  channel activity, was increased by isoflurane and a known mito  $K_{ATP}$  channel opener, diazoxide, in a 5-hydroxydecanoate-sensitive manner. Although flavoprotein oxidation induced by diazoxide was dissipated soon after its removal from the buffer, flavoprotein oxidation induced by isoflurane was sustained after cessation of the treatment. The sustained increase in flavoprotein oxidation was associated with a significant reduction in infarct size after 30 min of ischemia followed by 120 min of reperfusion. Although adenosine and S-nitroso-N-acetyl-penicillamine each alone did not increase flavoprotein fluorescence, nor did they confer significant cardioprotection, coadministration of adenosine and S-nitroso-N-acetyl-penicillamine with isoflurane conferred a highly significant reduction of infarct size and improvement of left ventricular function without increasing flavoprotein oxidation over isoflurane alone. The early treatment with 5-hydroxydecanoate before and during preconditioning completely reversed flavoprotein oxidation and inhibited the infarct-sparing effect of isoflurane and combined preconditioning with isoflurane, adenosine, and S-nitroso-N-acetyl-penicillamine. The late treatment with 5-hydroxydecanoate after preconditioning abolished flavoprotein oxidation and the infarct-sparing effect of isoflurane but only partially inhibited cardioprotection conferred by the combined preconditioning, despite complete abrogation of flavoprotein oxidation.

**Conclusions:** Mito  $K_{ATP}$  channel activation is the essential trigger of both preconditioning with isoflurane and combined preconditioning with isoflurane, adenosine, and S-nitroso-N-acetyl-penicillamine. Mito  $K_{ATP}$  channel activation is also a crucial mediator of cardioprotection afforded by preconditioning with isoflurane. However, enhanced cardioprotection con-

ferred by combined preconditioning is mediated through both mito  $K_{ATP}$  channel-dependent and -independent mechanisms.

BRIEF periods of cardiac ischemia and reperfusion exert a protective effect against subsequent, more prolonged period of ischemia, a phenomenon termed *ischemic preconditioning* (IPC).<sup>1</sup> IPC-like effects have also been observed by administration of various pharmacologic agents. Volatile anesthetics, including isoflurane, have long been known as such cardioprotective agents against ischemia-reperfusion injury, and this cardioprotective effect has at least in part been attributed to opening of mitochondrial adenosine triphosphate-sensitive  $K^+$  (mito  $K_{ATP}$ ) channels.<sup>2-8</sup> Despite accumulating evidence showing cardioprotection afforded by isoflurane, the exact role of mito  $K_{ATP}$  channels in isoflurane-induced cardioprotection remains to be investigated.

Pharmacologic preconditioning (PPC) has been performed by using IPC mimetic drugs, such as adenosine, a G protein-coupled receptor agonist (GPCRA)<sup>9,10</sup>; diazoxide, a mito  $K_{ATP}$  channel opener<sup>11</sup>; and nitric oxide donors.<sup>12,13</sup> However, acute cardioprotection by single PPC with adenosine, diazoxide, or nitric oxide donors remains a controversial issue. There are a number of studies showing that PPC with each drug alone confers significant cardioprotection,<sup>11-15</sup> but also, a considerable number of studies have failed to substantiate acute cardioprotection by PPC with single-drug administration.<sup>16-18</sup> It is not surprising that a single PPC strategy failed to completely mimic IPC because IPC is mediated by complex signaling cascades arising from multiple triggers. Ninomiya *et al.*<sup>19</sup> have demonstrated that PPC with adenosine had no acute benefit in functional protection after global ischemia, whereas administration of adenosine during IPC was capable of significantly enhancing IPC-induced protection. This observation suggests that adenosine enhancement of IPC-induced cardioprotection is elicited by robust activation of G protein-coupled receptors in concert with other, yet unidentified triggers produced by preconditioning ischemia and reperfusion. Our subsequent studies<sup>20,21</sup> have shown that adenosine in combination with a mito  $K_{ATP}$  channel opener and a nitric oxide donor is necessary to completely mimic IPC, and pretreatment with a Gi/o protein inhibitor, pertussis toxin, a mito  $K_{ATP}$  channel inhibitor, 5-hydroxydecanoate (5-HD), or a nitric oxide

\* Research Fellow, ‡ Associate Professor, || Professor, Department of Anesthesiology, † Associate Professor, § Professor, Department of Thoracic and Cardiovascular Surgery.

Received from the Departments of Anesthesiology and Thoracic and Cardiovascular Surgery, Kansai Medical University, Moriguchi City, Japan. Submitted for publication August 22, 2003. Accepted for publication November 20, 2003. Supported in part by The Promotion and Mutual Aid Corporation for Private Schools of Japan, Tokyo, Japan. (Dr. Imamura) and The Science Research Promotion Fund (Dr. Nakao), Tokyo, Japan.

Address reprint requests to Dr. Otani: Department of Thoracic and Cardiovascular Surgery, Kansai Medical University 10-15 Fumizono-cho, Moriguchi City, 570-8507, Japan. Address electronic mail to: otanih@takii.kmu.ac.jp. Individual article reprints may be purchased through the Journal Web site, www.anesthesiology.org.

scavenger, 2-(4-carboxyphenyl)-4,4,5,5-tetramethylimidazole-1-oxyl-3-oxide, completely abrogated cardioprotection afforded by combined preconditioning. This observation has led us to hypothesize that GPCRA and nitric oxide are the likely cotriggers of successful preconditioning with a mito  $K_{ATP}$  channel opener. Requirement of a GPCRA and a nitric oxide donor may also be the case for isoflurane to confer optimal cardioprotection. Patel *et al.*<sup>22</sup> have demonstrated that a known GPCRA,  $\delta$  opioid, enhances an infarct-sparing effect of isoflurane. Moreover, the fact that functional protection mediated by the nitric oxide donor nicorandil<sup>23</sup> was enhanced by isoflurane, which by itself exerted no functional benefit,<sup>24</sup> points to the conclusion that isoflurane requires coadministration with a nitric oxide donor to mediate functional protection. Therefore, we attempted to address the issue of whether coadministration with a GPCRA and a nitric oxide donor potentiates cardioprotection by preconditioning with isoflurane and whether such enhanced cardioprotection occurs solely through activation of mito  $K_{ATP}$  channels or also through mito  $K_{ATP}$  channel-independent mechanisms.

## Materials and Methods

### *Perfusion Technique and Flavoprotein Fluorescence Measurement*

Male Sprague-Dawley rats weighing 250–300 g were used in the current study. All experiments were conducted in accordance with the *Guidelines for the Care and Use of Laboratory Animals*<sup>25</sup> and were approved by Animal Care Committee of Kansai Medical University (Moriguchi, Japan). The rats were anesthetized intraperitoneally with pentobarbital sodium (100 mg/kg). After thoracotomy, the heart was rapidly excised, placed in a temperature-regulated heart chamber installed in a CAF-110 intracellular ion analyzer (Japan Spectroscopic Co., Tokyo, Japan), and perfused at a constant mean pressure of 60–70 mmHg with Krebs-Henseleit bicarbonate buffer solution with the following composition: 118 mM NaCl, 4.7 mM KCl, 1.2 mM  $MgSO_4$ , 25 mM  $NaHCO_3$ , 1.2 mM  $KH_2PO_4$ , 1.8 mM  $CaCl_2$ , and 11 mM glucose, with a pH of 7.4 at 37°C when equilibrated with a mixture of 95%  $O_2$  and 5%  $CO_2$  gas.

During the stabilization period, a latex balloon was inserted into the left ventricle through the left atrium to measure isovolumic left ventricular (LV) function. The balloon was filled with saline solution to produce an LV end-diastolic pressure of 5–10 mmHg at baseline, and the balloon volume was kept constant throughout the experiment. The hearts with LV developed pressure less than 80 mmHg or heart rate less than 240 beats/min at baseline were excluded from the study. LV developed pressure and heart rate were expressed as percentage of the baseline values.

Flavoprotein fluorescence of the heart was monitored

as an index for mito  $K_{ATP}$  channel activity as described previously.<sup>20,26</sup> Briefly, fluorescence excitation was provided by a xenon lamp with a band-pass filter centered at 480 nm. The excitation light was diverted onto a circular region of the LV epicardium with a diameter of 1 cm by means of a dichroic mirror. Fluorescence then passed through an emission filter centered at 530 nm before reaching a photomultiplier. The photomultiplier output was digitized, and the fluorescence was displayed on a strip-chart recorder. At the end of each experiment, dinitrophenol (1 mM) was added to elicit full oxidation of mitochondrial flavoprotein. Data were expressed as percentage of the dinitrophenol-induced fluorescence.

### *Experimental Protocol*

First, we studied the dose-response effect of a known mito  $K_{ATP}$  channel opener, diazoxide, and isoflurane on mito  $K_{ATP}$  channel activity. Applied concentrations of isoflurane in the perfusate buffer (0, 0.5, 1.0, 2.0, 3.0, and 4.0%) were measured by gas chromatography with a flame ionization detector (GC14-B; Shimadzu, Kyoto, Japan). The isoflurane concentrations in the sample portion were  $70 \pm 8\%$  of those in the flask at all concentrations of isoflurane tested. To confirm that the observed increase in flavoprotein fluorescence was a result of mito  $K_{ATP}$  channel activation, 5-HD (0.5 mM), a relatively selective inhibitor of mito  $K_{ATP}$  channels, was used.

Left ventricular function and infarct size were evaluated in the protocol as shown in figure 1, in which the hearts were subjected to 30 min of global ischemia followed by 120 min of reperfusion. In protocol 1, we compared the effect of preconditioning with 50  $\mu M$  diazoxide and 1 minimum alveolar concentration (MAC) of isoflurane on mito  $K_{ATP}$  channel activity and cardioprotection. This concentration of diazoxide was chosen because it is known to confer maximum cardioprotection with fewer nonspecific effects.<sup>27</sup> One MAC of isoflurane in the rat<sup>28</sup> was obtained by means of a 2% mixture of this volatile anesthetic agent in our experimental model. Diazoxide and isoflurane were administered for 25 min and were discontinued 20 min before the index ischemia. 5-HD was given 10 min before and during and after the treatment with diazoxide and isoflurane. Reperfusion was performed for 120 min to assess myocardial infarct size.

In protocol 2, we compared the cardioprotective effect of preconditioning with isoflurane, adenosine, and a nitric oxide donor, S-nitroso-N-acetyl-penicillamine (SNAP), each alone or in combination. The dose of adenosine used in the current study (10  $\mu M$ ) seems to be appropriate as preconditioning stimulation because this dose of adenosine has been shown to increase cardiac interstitial adenosine to a level comparable with that produced by IPC.<sup>29</sup> SNAP at a dose of 10  $\mu M$  was chosen in this experimental model because we have found that

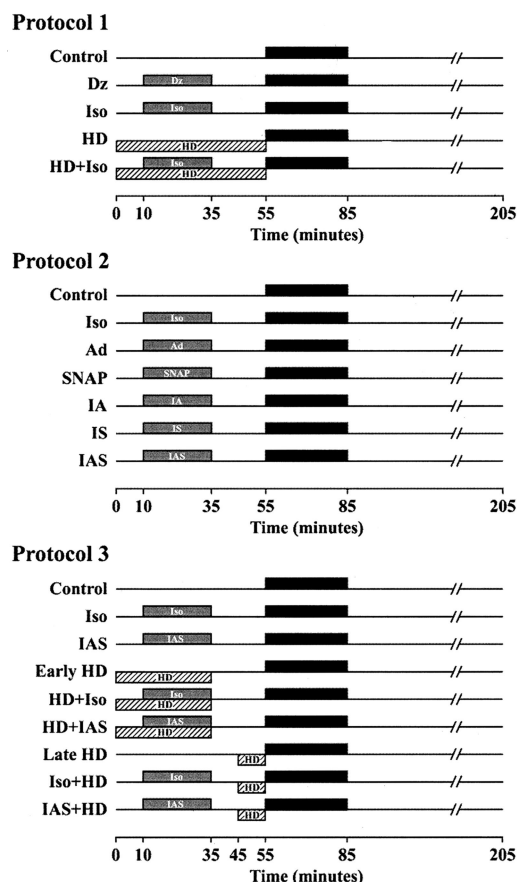

**Fig. 1.** Experimental protocol. Protocol 1: Control = 30 min of ischemia (filled boxes) followed by 120 min of reperfusion; Dz = preconditioning with 50  $\mu$ M diazoxide; HD = pretreatment with 0.5 mM 5-hydroxydecanoate; HD + Iso = pretreatment with 0.5 mM HD 10 min before and throughout preconditioning with Iso; Iso = preconditioning with 2% isoflurane. Protocol 2: Ad = preconditioning with 10  $\mu$ M adenosine; IA = preconditioning with Iso and Ad; IAS = preconditioning with Iso, Ad, and SNAP; IS = preconditioning with Iso and SNAP; SNAP = preconditioning with 10  $\mu$ M S-nitroso-N-acetyl-penicillamine. Protocol 3: Early HD = treatment with HD between 55 and 25 min before ischemia; HD + IAS = treatment with HD 10 min before and during combined preconditioning with Iso, Ad, and SNAP; HD + Iso = treatment with HD 10 min before and during preconditioning with Iso; IAS + HD = combined preconditioning with Iso, Ad, and SNAP followed by treatment with HD for 10 min just before ischemia; Iso + HD = preconditioning with Iso followed by treatment with HD for 10 min just before ischemia; Late HD = treatment with HD for 10 min just before ischemia.

SNAP at concentrations up to 50  $\mu$ M had no adverse effect on LV function.<sup>21</sup>

In the protocol 3, we investigated the role of mito K<sub>ATP</sub> channels in cardioprotection conferred by combined preconditioning with isoflurane, adenosine, and SNAP. In this set of experiments, 5-HD was administered 10 min before and during preconditioning with isoflurane or the combined PPC as the early treatment modality or for 10 min just before 30 min of ischemia as the late treatment modality.

Isoflurane was purchased from Abbott Laboratories (Abbott Park, IL). Diazoxide, adenosine, and dinitrophenol

were obtained from Sigma-Aldrich Japan (Tokyo, Japan). SNAP was purchased from Wako Pure Chemical (Osaka, Japan), and 5-HD was obtained from BIOMOL Research Laboratories (Plymouth Meeting, PA). Diazoxide and SNAP were dissolved in dimethyl sulfoxide. The final concentration of dimethyl sulfoxide was less than 0.05%.

### Infarct Size Measurement

After termination of experiments, the heart was trimmed to remove the atrium, the right ventricular free wall, and the connective tissues and was sliced transversely in a plane perpendicular to the apical-basal axis into approximately 1-mm-thick slices. The slices were immersed in phosphate-buffered saline containing 2% triphenyltetrazolium chloride for 15 min at 37°C and fixed with 10% formaldehyde in 0.1 M phosphate buffer (pH 7.2) at room temperature. The brick red area was traced with the use of National Institutes of Health 1.61 image-processing software (Bethesda, MD), and each digitized image was subjected to equivalent degrees of background subtraction, brightness, and contrast enhancement for improved clarity and distinctness. The areas at risk (equivalent to total LV mass), as well as the infarct zones of each slice, were calculated in terms of pixels. The infarct volume was calculated, and the sum of all slices was used to compute a ratio of percent infarct to total LV mass.

### Statistics

All numerical data are expressed as mean  $\pm$  SEM. Statistical analysis was performed by one-way analysis of variance, followed by the Bonferroni *post hoc* test.  $P < 0.05$  was considered statistically significant.

## Results

### Isoflurane Provokes Flavoprotein Oxidation in a Concentration-dependent Manner

Flavoprotein fluorescence was stabilized within 15 min after Langendorff perfusion with Krebs-Henseleit bicarbonate buffer and remained stable over 120 min (not shown). Addition of diazoxide increased flavoprotein fluorescence, which reached a plateau within 5 min (fig. 2A). The increase in flavoprotein fluorescence induced by diazoxide was abolished by treatment with 0.5 mM 5-HD, which by itself did not affect baseline flavoprotein fluorescence. The dose-response study showed that 50  $\mu$ M diazoxide provoked a nearly maximal increase in flavoprotein fluorescence (fig. 2B). Isoflurane increased flavoprotein fluorescence, but the increase in flavoprotein fluorescence was slower than that observed with diazoxide, taking 15–20 min to reach a plateau (fig. 2C). This flavoprotein oxidation induced by isoflurane was also sensitive to 5-HD, suggesting that mito K<sub>ATP</sub>



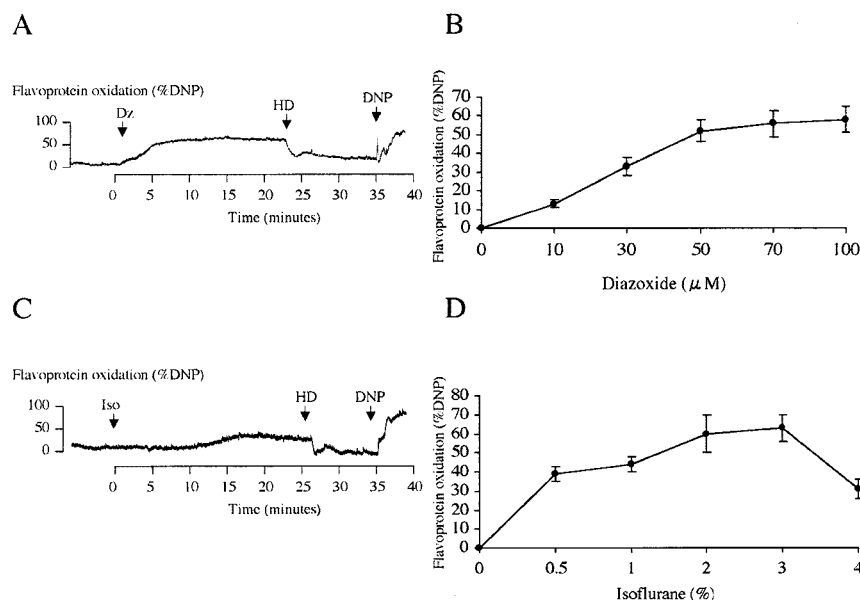

**Fig. 2.** Effect of 5-hydroxydecanoate (HD) on diazoxide (Dz)- and isoflurane (Iso)-induced changes in flavoprotein oxidation. (A) Representative trace of the change in flavoprotein fluorescence by treatment with 50  $\mu$ M diazoxide followed by cotreatment with 0.5 mM HD. Dinitrophenol (DNP; 1 mM) was added to maximally activate flavoprotein oxidation. The data are expressed as a percentage of dinitrophenol-induced flavoprotein oxidation. (B) Dose-response effect of diazoxide on flavoprotein oxidation. (C) Representative trace of the change in flavoprotein fluorescence by treatment with 2% isoflurane followed by cotreatment with HD. (D) Dose-response effect of isoflurane on flavoprotein oxidation. The data are expressed as mean  $\pm$  SEM of seven experiments.

channel activation is responsible for the increase in flavoprotein fluorescence induced by isoflurane. The amplitude of flavoprotein fluorescence was increased with increasing isoflurane concentrations in a range between 0.5 and 3.0% (fig. 2D), and further increase in isoflurane concentration reduced flavoprotein fluorescence as expressed by percent of dinitrophenol-induced flavoprotein oxidation (2% isoflurane:  $60 \pm 10$ ; 3% isoflurane:  $63 \pm 7$ ; 4% isoflurane:  $31 \pm 5$ ).

#### *Isoflurane but Not Diazoxide Induces Sustained Activation of Mito $K_{ATP}$ Channels*

Although both diazoxide and isoflurane increased flavoprotein fluorescence, a major difference in the pattern of flavoprotein fluorescence between these two agents was observed after cessation of the treatment. The increase in flavoprotein fluorescence induced by diazoxide was dissipated soon after its removal from the buffer, whereas that induced by isoflurane was sustained after cessation of the treatment (fig. 3).

#### *Preconditioning with Isoflurane but Not with Diazoxide Confers Cardioprotection*

We compared the effect of preconditioning with diazoxide to that of isoflurane on cardioprotection (protocol 1). Preconditioning with 50  $\mu$ M diazoxide did not significantly reduce infarct size compared with control ( $P = 0.201$ ; fig. 4). In contrast, preconditioning with isoflurane was effective in significantly reducing infarct size.

Baseline LV function was not significantly different in all groups. We compared LV function 45 min after reperfusion because maximum recovery of LV systolic function was observed between 30 min and 60 min after reperfusion in all the hearts. LV function was not significantly improved by preconditioning with diazoxide (ta-

ble 1). Isoflurane was also without a significant effect on the recovery of LV function.

Treatment with 5-HD by itself had no significant effect on infarct size and postischemic recovery of LV function. However, the infarct-sparing effect of preconditioning with isoflurane was abolished by 5-HD, suggesting that activation of mito  $K_{ATP}$  channels is involved in the infarct-sparing effect mediated by preconditioning with isoflurane.

#### *Combined Preconditioning with Isoflurane, Adenosine, and SNAP Potentiates Cardioprotection without Enhancement of Flavoprotein Oxidation*

We investigated whether cardioprotection afforded by preconditioning with isoflurane can be enhanced by coadministration with adenosine and SNAP (protocol 2). In contrast to preconditioning with isoflurane, preconditioning with adenosine and SNAP alone did not significantly reduce infarct size compared with control ( $P = 0.274$  and  $P = 0.225$ , respectively; fig. 5). Coadministration of isoflurane with adenosine but not SNAP significantly improved LV function (table 2) and enhanced the infarct-sparing effect of preconditioning with isoflurane. Moreover, only preconditioning with isoflurane in combination with adenosine and SNAP significantly enhanced postischemic recovery of LV function and reduced infarct size over preconditioning with isoflurane alone.

Neither adenosine nor SNAP by itself significantly affected baseline flavoprotein fluorescence (fig. 6). Isoflurane significantly increased flavoprotein oxidation as described before. However, isoflurane in combination with adenosine and SNAP did not further increase in flavoprotein oxidation over isoflurane alone during and after treatment.

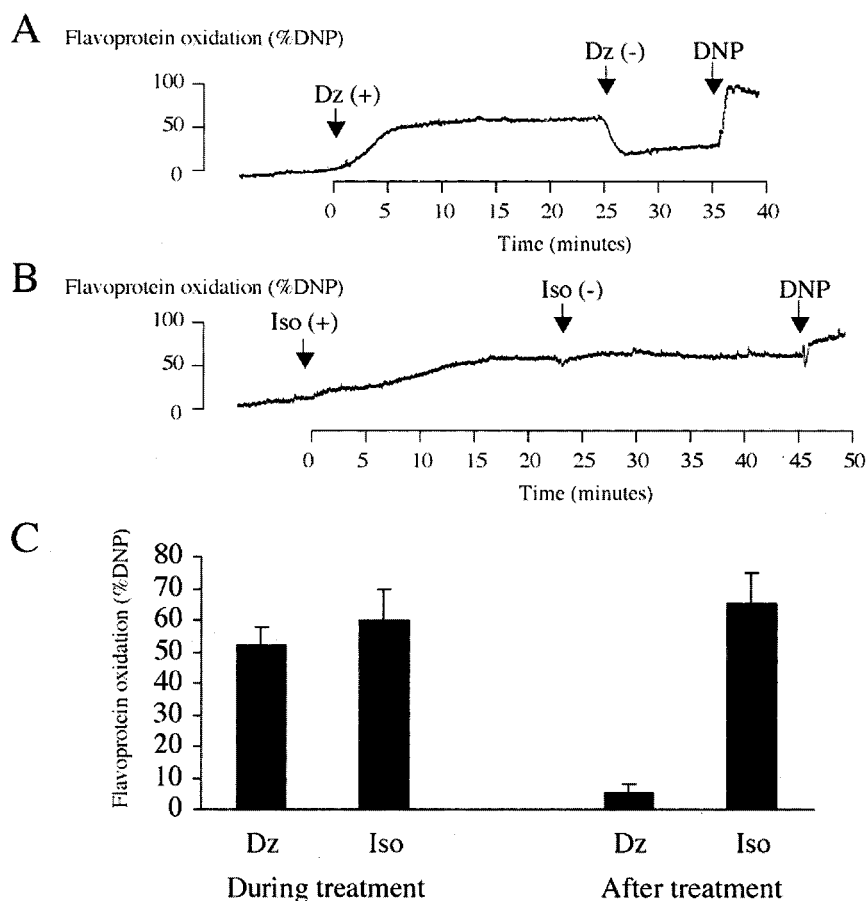

**Fig. 3.** Change in flavoprotein oxidation during treatment with and after washout of diazoxide and isoflurane. (A) Representative trace of the change in flavoprotein fluorescence by treatment with 50  $\mu$ M diazoxide [Dz (+)] followed by removal of diazoxide [Dz (-)]. Dinitrophenol (DNP; 1 mM) was added to maximally activate flavoprotein oxidation. The data were expressed as a percentage of 1% dinitrophenol-induced flavoprotein oxidation. (B) Representative trace of the change in flavoprotein fluorescence by treatment with 2% isoflurane [Iso (+)] followed by removal of isoflurane [Iso (-)]. (C) Quantitative analysis of flavoprotein oxidation during and after treatment with diazoxide and isoflurane. Each bar represents the mean  $\pm$  SEM of seven experiments.

#### Early Treatment with 5-HD Completely Inhibits but Late Treatment with 5-HD Only Partially Inhibits Cardioprotection Afforded by Combined Preconditioning with Isoflurane, Adenosine, and SNAP

Mito K<sub>ATP</sub> channels may act as a trigger of cardioprotection conferred by combined preconditioning with isoflurane, adenosine, and SNAP. The trigger role of mito K<sub>ATP</sub> channels was tested by administration with 5-HD 10 min before and during the combined preconditioning (protocol 3). As was the case for preconditioning with isoflurane alone, the early treatment modality abolished

the infarct-sparing effect (fig. 7) and inhibited improvement of LV function conferred by combined preconditioning (table 3). Because powerful cardioprotection afforded by combined preconditioning was not correlated with the magnitude of flavoprotein oxidation, it was thought that mito K<sub>ATP</sub> channels might not be a sole mediator of the combined preconditioning. The mediator role of mito K<sub>ATP</sub> channels was tested by late treatment with 5-HD. The late treatment with 5-HD by itself had no effect on the recovery of LV function and infarct size. Although the late treatment with 5-HD completely inhibited the infarct-sparing effect conferred by precon-

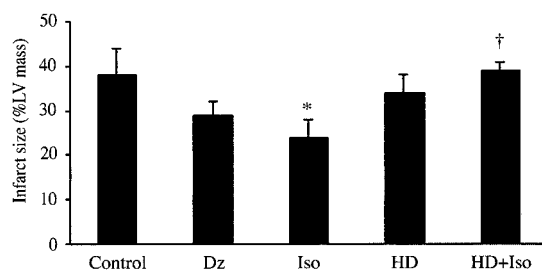

**Fig. 4.** Effect of preconditioning with diazoxide (Dz) and isoflurane (Iso) on myocardial infarct size. Experimental protocol is shown in protocol 1 in figure 1. Each bar represents the mean  $\pm$  SEM of seven experiments. \* $P < 0.05$  compared with control. † $P < 0.05$  compared with isoflurane. HD = 5-hydroxydecanoate; LV = left ventricular.

**Table 1. Effect of Preconditioning with Diazoxide and Isoflurane on the Recovery of Left Ventricular Function**

|                   | LVDP, % Baseline | HR, % Baseline | LVEDP, mmHg |
|-------------------|------------------|----------------|-------------|
| Control           | 55 $\pm$ 5       | 82 $\pm$ 3     | 31 $\pm$ 3  |
| Diazoxide         | 63 $\pm$ 4       | 77 $\pm$ 5     | 28 $\pm$ 3  |
| Isoflurane        | 60 $\pm$ 5       | 85 $\pm$ 5     | 34 $\pm$ 4  |
| 5-HD              | 48 $\pm$ 5       | 75 $\pm$ 12    | 40 $\pm$ 4  |
| 5-HD + isoflurane | 60 $\pm$ 6       | 95 $\pm$ 2     | 30 $\pm$ 2  |

Left ventricular function was measured 45 min after reperfusion following 30 min of ischemia. The experimental protocol is shown in protocol 1 in figure 1.

Data are expressed as mean  $\pm$  SEM of seven experiments.

5-HD = 5-hydroxydecanoate; HR = heart rate; LVDP = left ventricular developed pressure; LVEDP = left ventricular end-diastolic pressure.

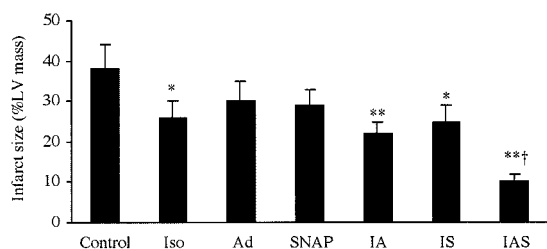

**Fig. 5.** Effect of preconditioning with isoflurane (Iso) in combination with or without adenosine (Ad) and S-nitroso-N-acetylpenicillamine (SNAP) on myocardial infarct size. Experimental protocol is shown in protocol 2 in figure 1. \*  $P < 0.05$ , \*\*  $P < 0.01$  compared with control. Each bar represents the mean  $\pm$  SEM of seven experiments. †  $P < 0.05$  compared with isoflurane. IA = isoflurane + adenosine; IAS = isoflurane + adenosine + SNAP; IS = isoflurane + SNAP; LV = left ventricular.

ditioning with isoflurane, the same treatment exerted significant but only partial inhibition against enhanced postischemic recovery of LV function and infarct size reduction afforded by combined preconditioning with isoflurane, adenosine, and SNAP. Either the early treatment or the late treatment with 5-HD abolished flavoprotein oxidation induced by combined preconditioning with isoflurane, adenosine, and SNAP (fig. 8).

## Discussion

The current study compared the efficacy of preconditioning with isoflurane to that of a mito  $K_{ATP}$  channel opener, diazoxide; GPCRA; adenosine; and a nitric oxide donor, SNAP, all of which are known to be mimetic of IPC. The results showed that preconditioning with isoflurane but not with diazoxide, adenosine, or SNAP conferred significant cardioprotection. The inability of preconditioning with diazoxide, adenosine, or SNAP alone to confer significant cardioprotection contradicts many former studies that showed significant cardiopro-

**Table 2.** Effect of Preconditioning with Isoflurane in Combination with or without Adenosine and SNAP on the Recovery of Left Ventricular Function

|            | LVDP, % Baseline | HR, % Baseline | LVEDP, mmHg  |
|------------|------------------|----------------|--------------|
| Control    | 55 $\pm$ 5       | 82 $\pm$ 3     | 31 $\pm$ 3   |
| Isoflurane | 60 $\pm$ 5       | 85 $\pm$ 5     | 34 $\pm$ 4   |
| Adenosine  | 58 $\pm$ 6       | 80 $\pm$ 4     | 29 $\pm$ 3   |
| SNAP       | 67 $\pm$ 7       | 89 $\pm$ 5     | 30 $\pm$ 4   |
| IA         | 74 $\pm$ 5*      | 87 $\pm$ 5     | 25 $\pm$ 5   |
| IS         | 68 $\pm$ 6       | 86 $\pm$ 3     | 31 $\pm$ 2   |
| IAS        | 81 $\pm$ 7†‡     | 95 $\pm$ 4     | 13 $\pm$ 2†§ |

Left ventricular function was measured 45 min after reperfusion following 30 min of ischemia. The experimental protocol is shown in protocol 1 in figure 2. Data are expressed as mean  $\pm$  SEM of seven experiments.

\*  $P < 0.05$ , †  $P < 0.01$  compared with control. ‡  $P < 0.05$ , §  $P < 0.01$  compared with isoflurane.

HR = heart rate; IA = isoflurane + adenosine; IAS = isoflurane + adenosine + SNAP; IS = isoflurane + SNAP; LVDP = left ventricular developed pressure; LVEDP = left ventricular end-diastolic pressure; SNAP = S-nitroso-N-acetylpenicillamine.

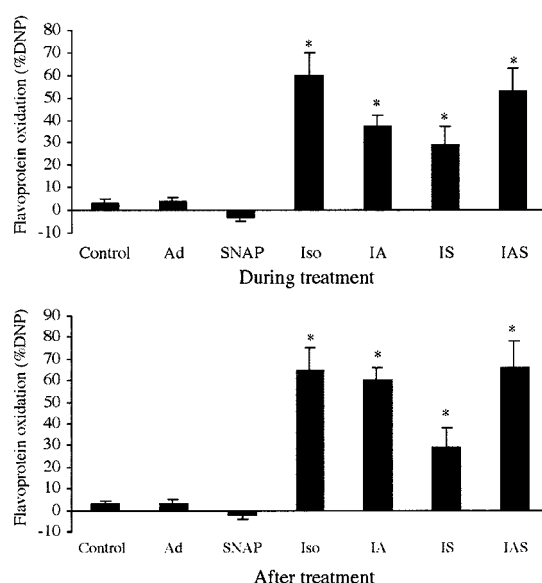

**Fig. 6.** Change in flavoprotein oxidation during and after treatment with 10  $\mu$ M adenosine (Ad), 10  $\mu$ M S-nitroso-N-acetylpenicillamine (SNAP), 2% isoflurane (Iso), isoflurane + adenosine (IA), isoflurane + SNAP (IS), and isoflurane + adenosine + SNAP (IAS). The data are expressed as a percentage of 1% dinitrophenol (DNP)-induced flavoprotein oxidation. Each bar represents the mean  $\pm$  SEM of seven experiments. \*  $P < 0.01$  compared with control.

tection by preconditioning with each drug alone.<sup>11-15</sup> The mechanism underlying the discrepant observation remains unclear. Although the statistical power with respect to the infarct-sparing effect of these drugs may be increased when the sample size is increased, such a statistical power would not substantially affect the conclusion that a cardioprotective effect of each drug alone is modest compared with that afforded by IPC. Alternatively, drug concentrations are possible explanations. We have tested a preconditioning effect of only single doses of drugs and did not attempt to undertake a dose-response study. We used 50  $\mu$ M diazoxide, a concentration known to confer maximum cardioprotection with less nonspecific effects.<sup>27</sup> This concentration of diazoxide was found to cause nearly maximum activation of flavoprotein oxidation, indicating that mito  $K_{ATP}$  channels were fully activated by this concentration of diazoxide. The doses of adenosine and SNAP seem to be lower than those used in other studies. However, this dose of adenosine was found to increase its interstitial concentration up to several times higher than that observed in IPC.<sup>29</sup> In addition, we have demonstrated in a previous study<sup>20</sup> that five-times higher doses of adenosine and SNAP than in the current study could not provoke significant flavoprotein oxidation and cardioprotection when each was used alone. Therefore, the inability of these drugs to put the heart into the preconditioned state may not solely be attributed to lower drug doses. The rationale for using lower doses of drugs is to elicit only a specific effect while avoiding unwanted side ef-

Fig. 7. Effect of early and late treatment with 5-hydroxydecanoate (HD) on the infarct-sparing effect of preconditioning with isoflurane (Iso) and combined preconditioning with isoflurane, adenosine, and S-nitroso-*N*-acetyl-penicillamine (IAS). Experimental protocol is shown in protocol 3 in figure 1. Each bar represents the mean  $\pm$  SEM of seven experiments. \*  $P < 0.05$ , \*\*  $P < 0.01$  compared with control. †  $P < 0.05$  compared with isoflurane. #  $P < 0.05$ , ##  $P < 0.01$  compared with IAS. LV = left ventricular.

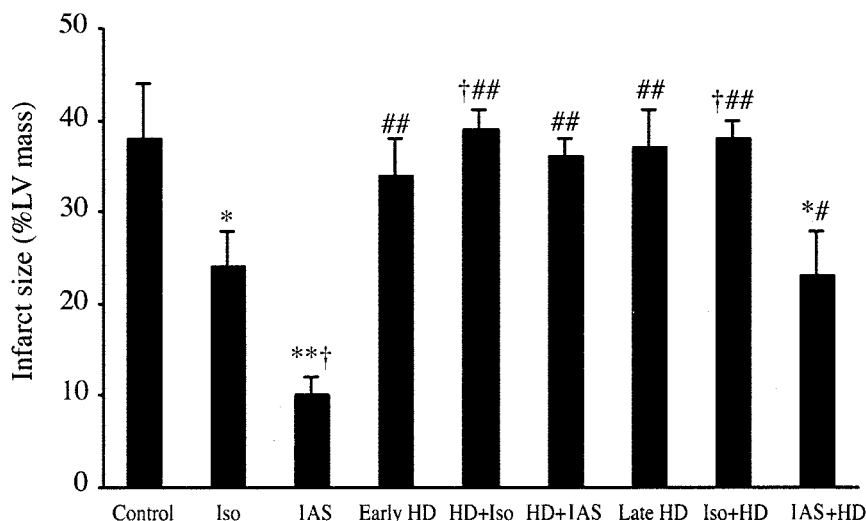

fects, which may be meritorious in the clinical setting of myocardial protection.

Although PPC with adenosine or SNAP was unable to confer cardioprotection, coadministration of these drugs with isoflurane dramatically potentiated cardioprotective effects conferred by isoflurane. We have previously demonstrated that preconditioning with adenosine, diazoxide, or SNAP alone was not capable of mediating cardioprotection, even at a higher dose than that which was used in this study, but the combination of these drugs conferred powerful cardioprotection that was as effective as IPC.<sup>20,21</sup> Moreover, cardioprotective signaling as evaluated by protein kinase C (PKC)- $\epsilon$  activity was increased only by IPC and the combined preconditioning. These observations suggested that enhanced cardioprotection by the combined preconditioning was not simply due to an additive effect but was a synergistic effect through integration of distinct signals arising from

each drug to robust cardioprotective signaling. The current study also points to the conclusion that subthreshold inputs of cardioprotective signaling provoked by adenosine and SNAP can augment isoflurane-induced cardioprotection.

We have studied the difference in the potency of cardioprotection between isoflurane and other known triggers of IPC with respect to the activity of mito K<sub>ATP</sub> channels. Because there is currently no direct means to measure mito K<sub>ATP</sub> channel activity in the intact heart and cardiomyocytes, we<sup>21,26</sup> and others<sup>30</sup> have adopted flavoprotein oxidation as an indirect index for mito K<sub>ATP</sub> channel activity. Using this technique, we showed in the current study that isoflurane and diazoxide increase flavoprotein oxidation in a concentration-dependent and a 5-HD-sensitive manner. A significant increase in flavoprotein fluorescence occurred with isoflurane concentrations ranging between 0.5 and 4%, but this effect was maximal at the concentrations between 2 and 3%, indicating that mito K<sub>ATP</sub> channels were fully activated by the isoflurane concentration used in the preconditioning study. The increase in flavoprotein oxidation induced by diazoxide and isoflurane was abolished in the presence of 5-HD, which did not affect flavoprotein fluorescence at baseline and flavoprotein oxidation induced by dinitrophenol,<sup>20</sup> suggesting that mito K<sub>ATP</sub> channel activation may be responsible for flavoprotein oxidation induced by diazoxide and isoflurane. A similar dose-response effect of volatile anesthetics on mito K<sub>ATP</sub> channels has been observed in isolated cardiomyocytes.<sup>31</sup>

The increase in flavoprotein oxidation induced by diazoxide reached a plateau within 5 min, whereas that induced by isoflurane was a slow process, taking 15–20 min to reach a plateau. Moreover, the increase in flavoprotein oxidation induced by isoflurane was sustained after cessation of the treatment, while that induced by diazoxide was dissipated soon after its removal from the buffer. The sustained increase in flavoprotein oxidation

Table 3. Effect of Early and Late Treatment with 5-HD on Improved Left Ventricular Function Afforded by Preconditioning with Isoflurane and Combined Preconditioning with Isoflurane, Adenosine, and SNAP

|                   | LVDP, %<br>Baseline | HR, %<br>Baseline | LVEDP, mmHg |
|-------------------|---------------------|-------------------|-------------|
| Control           | 55 $\pm$ 5          | 82 $\pm$ 3        | 31 $\pm$ 3  |
| Iso               | 60 $\pm$ 5          | 85 $\pm$ 5        | 34 $\pm$ 4  |
| IAS               | 81 $\pm$ 7*         | 95 $\pm$ 4        | 13 $\pm$ 2* |
| Early 5-HD        | 57 $\pm$ 6          | 87 $\pm$ 7        | 30 $\pm$ 3  |
| 5-HD + Isoflurane | 60 $\pm$ 6          | 95 $\pm$ 2        | 30 $\pm$ 2  |
| 5-HD + IAS        | 63 $\pm$ 6          | 85 $\pm$ 8        | 25 $\pm$ 2  |
| Late 5-HD         | 58 $\pm$ 6          | 84 $\pm$ 5        | 34 $\pm$ 4  |
| Isoflurane + 5-HD | 58 $\pm$ 4          | 78 $\pm$ 5        | 35 $\pm$ 2  |
| IAS + 5-HD        | 69 $\pm$ 7          | 99 $\pm$ 8        | 20 $\pm$ 3* |

Left ventricular function was measured 45 min after reperfusion following 30 min of ischemia. The experimental protocol is shown in protocol 3 in figure 1. Data are expressed as mean  $\pm$  SEM of seven experiments.

\*  $P < 0.01$  compared with control.

5-HD = 5-hydroxydecanoate; HR = heart rate; IAS = isoflurane + adenosine + SNAP; LVDP = left ventricular developed pressure; LVEDP = left ventricular end-diastolic pressure; SNAP = S-nitroso-*N*-acetyl-penicillamine.



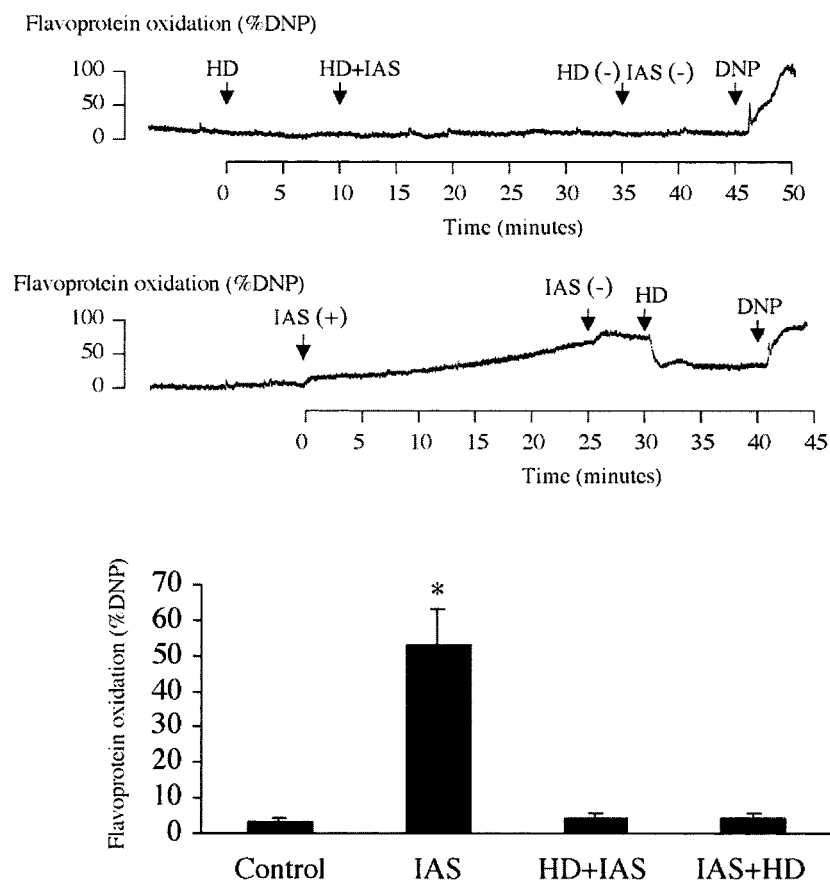

Fig. 8. Effect of early and late treatment with 5-hydroxydecanoate (HD) on flavoprotein oxidation induced by combined preconditioning with isoflurane, adenosine, and S-nitroso-N-acetyl-penicillamine (IAS). In the pretreatment modality, 0.5 mM HD was administered 10 min before and during treatment with IAS. In the late treatment modality, HD was administered after treatment with IAS. The data are expressed as a percentage of 1% dinitrophenol (DNP)-induced flavoprotein oxidation. Each bar represents mean  $\pm$  SEM of seven experiments. \*  $P < 0.01$  compared with control.

induced by preconditioning with isoflurane but not with diazoxide was associated with significant reduction of infarct size. Therefore, there was correlation between flavoprotein oxidation at the time of index ischemia and cardioprotection. These findings provide an explanation for the discrepant results regarding the efficacy of cardioprotection between preconditioning with diazoxide and isoflurane and imply that the mechanism of activation of mito  $K_{ATP}$  channels may be different between these two agents. Because isoflurane is a lipophilic substance that partitions into membranes, it presumably takes longer than diazoxide to be fully expelled from tissues. A more intriguing hypothesis is that additional triggers of preconditioning besides mito  $K_{ATP}$  channels may be involved in isoflurane-induced sustained activation of mito  $K_{ATP}$  channels. Accumulating evidence suggests that isoflurane not only activates mito  $K_{ATP}$  channels, but also activates other signaling cascades. Isoflurane has been shown to induce protection of human myocardium from anoxic injury *via* adenosine  $A_1$  receptors and  $K_{ATP}$  channels.<sup>32</sup> Involvement of G protein-coupled receptors in isoflurane-induced cardiac preconditioning was further suggested by the fact that the blockade of Gi/o proteins by pertussis toxin abolished the infarct size-limiting effect of isoflurane in the canine heart.<sup>33</sup> Furthermore, another volatile anesthetic agent, halothane, has been shown to directly interact

with G protein-coupled receptors.<sup>34</sup> Isoflurane is also capable of producing nitric oxide in the mouse brain.<sup>35</sup> Finally, the cardioprotective effect of volatile anesthetics was found to be dependent on PKC.<sup>36</sup> Although mito  $K_{ATP}$  channels could be opened by mito  $K_{ATP}$  channel openers without PKC activation, a priming effect of PKC activation on enhanced mito  $K_{ATP}$  channel opening has been demonstrated,<sup>30</sup> and this mechanism may also be crucial in the sustained activation of mito  $K_{ATP}$  channels that was attributed to the "acute memory" of cardioprotection afforded by isoflurane.<sup>6</sup> Therefore, it is likely that isoflurane provokes sustained activation of mito  $K_{ATP}$  channels even after cessation of the treatment, presumably through activation of multiple signaling pathways that converge on PKC activation, as has been proposed by Zaugg *et al.*<sup>36</sup>

The current study investigated the role of mito  $K_{ATP}$  channels in cardioprotection afforded by isoflurane and combined preconditioning with isoflurane, adenosine, and SNAP. The early treatment with 5-HD completely abolished the infarct size-limiting effect of isoflurane and the combined preconditioning, indicating that mito  $K_{ATP}$  channels are the essential trigger of preconditioning with isoflurane and the combined preconditioning. However, although cardioprotection conferred by preconditioning with isoflurane was completely abrogated by the late treatment with 5-HD, that afforded by the



combined preconditioning was only partially inhibited by the late treatment with 5-HD, which abolished flavoprotein oxidation mediated by isoflurane and the combined preconditioning. These observations suggest that cardioprotection afforded by isoflurane is mediated through mito K<sub>ATP</sub> channel activation, while the combined preconditioning-mediated cardioprotection occurs through both mito K<sub>ATP</sub> channel-dependent and -independent mechanisms. The evidence that the combined preconditioning conferred superior cardioprotection over isoflurane alone is consistent with a recent study<sup>17</sup> showing that the K<sub>ATP</sub> channel opener bimakalim alone had no infarct size-limiting effect, whereas the simultaneous administration of adenosine and bimakalim resulted in a marked decrease in infarct size, suggesting a synergism between adenosine and K<sub>ATP</sub> channels in the combined preconditioning-mediated cardioprotection. Taken together, our study reinforces the hypothesis that a synergistic interaction of multiple triggers, including mito K<sub>ATP</sub> channels, GPCR, and a nitric oxide donor, promotes signaling pathways that culminate in robust cardioprotection through mito K<sub>ATP</sub> channel-dependent and -independent mechanisms. Whether these cardioprotective mechanisms are promoted by PKC or in concert with other signaling pathways remains to be determined.

## Conclusions

The current study showed that preconditioning with isoflurane in combination with low doses of adenosine and SNAP, which by themselves had no significant benefit in cardioprotection, significantly enhanced cardioprotection over preconditioning with isoflurane alone. The powerful cardioprotection mediated by the combined PPC technique is not simply additive to isoflurane of which cardioprotection may be ascribed solely to mitochondrial K<sub>ATP</sub> channel activation, but is synergistic through both mitochondrial K<sub>ATP</sub> channel-dependent and -independent mechanisms. Therefore, the current study suggests that exogenous addition of a GPCR and a nitric oxide donor represents a reasonable approach to enhance cardioprotection afforded by isoflurane. However, clinical evidence has been lacking as to whether combined preconditioning is in fact necessary to confer superior cardioprotection over volatile anesthetic agents alone despite the fact that volatile anesthetic agents are often used in conjunction with GPCRs such as adenosine and norepinephrine and nitric oxide donors such as nitroglycerine and sodium nitroprusside in cardiac surgery. Future clinical trials are warranted to address this issue.

## References

- Murry CE, Jennings RB, Reimer KA: Preconditioning with ischemia: A delay of lethal cell injury in ischemic myocardium. *Circulation* 1986; 74:1124-36
- Davis RF, Sidi A: Effect of isoflurane on the extent of myocardial necrosis and on systemic hemodynamics, regional myocardial blood flow, and regional myocardial metabolism in dogs after coronary artery occlusion. *Anesth Analg* 1989; 69:575-86
- Oguchi T, Kashimoto S, Yamaguchi T, Nakamura T, Kumazawa T: Comparative effects of halothane, enflurane, isoflurane and sevoflurane on function and metabolism in the ischaemic rat heart. *Br J Anaesth* 1995; 74:569-75
- Kersten JR, Schmeling TJ, Hettrick DA, Pagel PS, Gross GJ, Warltier DC: Mechanism of myocardial protection by isoflurane: Role of adenosine triphosphate-regulated potassium (K<sub>ATP</sub>) channels. *ANESTHESIOLOGY* 1996; 85:794-807
- Cope DK, Impastato WK, Cohen MV, Downey JM: Volatile anesthetics protect the ischemic rabbit myocardium from infarction. *ANESTHESIOLOGY* 1997; 86:699-709
- Kersten JR, Schmeling TJ, Pagel PS, Gross GJ, Warltier DC: Isoflurane mimics ischemic preconditioning *via* activation of K<sub>ATP</sub> channels: Reduction of myocardial infarct size with an acute memory phase. *ANESTHESIOLOGY* 1997; 87:361-70
- Cason BA, Gamperl AK, Slocum RE, Hickey RF: Anesthetic-induced preconditioning: Previous administration of isoflurane decreases myocardial infarct size in rabbits. *ANESTHESIOLOGY* 1997; 87:1182-90
- Pirou V, Chiari P, Knezynski S, Bastien O, Loufoua J, Lehot JJ, Foex P, Annat G, Ovize M: Prevention of isoflurane-induced preconditioning by 5-hydroxydecanoate and gadolinium: Possible involvement of mitochondrial adenosine triphosphate-sensitive potassium and stretch-activated channels. *ANESTHESIOLOGY* 2000; 93:756-64
- Liu GS, Thornton J, Van Winkle DM, Stanley AW, Olsson RA, Downey JM: Protection against infarction afforded by preconditioning is mediated by A<sub>1</sub> adenosine receptors in rabbit heart. *Circulation* 1991; 84:350-6
- Toombs CF, McGee S, Johnston WE, Vinten-Johansen J: Myocardial protective effects of adenosine: Infarct size reduction with pretreatment and continued receptor stimulation during ischemia. *Circulation* 1992; 86:986-94
- Pain T, Yang XM, Critz SD, Yue Y, Nakano A, Liu GS, Heusch G, Cohen MV, Downey JM: Opening of mitochondrial K<sub>ATP</sub> channels triggers the preconditioned state by generating free radicals. *Circ Res* 2000; 87:460-6
- Nakano A, Liu GS, Heusch G, Downey JM, Cohen MV: Exogenous nitric oxide can trigger a preconditioned state through a free radical mechanism, but endogenous nitric oxide is not a trigger of classical ischemic preconditioning. *J Mol Cell Cardiol* 2000; 32:1159-67
- Lochner A, Marais E, Genade S, Moolman JA: Nitric oxide: A trigger for classic preconditioning? *Am J Physiol Heart Circ Physiol* 2000; 279:H2752-65
- Cohen MV, Yang XM, Liu GS, Heusch G, Downey JM: Acetylcholine, bradykinin, opioids, and phenylephrine, but not adenosine, trigger preconditioning by generating free radicals and opening mitochondrial K<sub>ATP</sub> channels. *Circ Res* 2001; 89:273-8
- Thornton JD, Liu GS, Olsson RA, Downey JM: Intravenous pretreatment with A<sub>1</sub>-selective adenosine analogues protects the heart against infarction. *Circulation* 1992; 85:659-65
- Cave AC, Collis CS, Downey JM, Hearse DJ: Improved functional recovery by ischaemic preconditioning is not mediated by adenosine in the globally ischaemic isolated rat heart. *Cardiovasc Res* 1993; 27:663-8
- Yao Z, Mizumura T, Mei DA, Gross GJ: KATP channels and memory of ischemic preconditioning in dogs: Synergism between adenosine and KATP channels. *Am J Physiol* 1997; 272:H334-42
- Belhomme D, Peynet J, Florens E, Tibourtine O, Kitakaze M, Menasche P: Is adenosine preconditioning truly cardioprotective in coronary artery bypass surgery? *Ann Thorac Surg* 2000; 70:590-4
- Ninomiya H, Otani H, Lu K, Uchiyama T, Kido M, Imamura H: Enhanced IPC by activation of pertussis toxin-sensitive and -insensitive G protein-coupled purinoceptors. *Am J Physiol Heart Circ Physiol* 2002; 282:H1933-43
- Uchiyama Y, Otani H, Okada T, Uchiyama T, Ninomiya H, Kido M, Imamura H, Nakao S, Shingu K: Integrated pharmacological preconditioning in combination with adenosine, a mitochondrial K<sub>ATP</sub> channel opener and a nitric oxide donor. *J Thorac Cardiovasc Surg* 2003; 126:148-59
- Otani H, Okada T, Fujiwara H, Uchiyama T, Sumida T, Kido M, Imamura H: Combined pharmacological preconditioning with a G-protein-coupled receptor agonist, a mitochondrial K<sub>ATP</sub> channel opener and a nitric oxide donor mimics ischaemic preconditioning. *Clin Exp Pharmacol Physiol* 2003; 30:684-93
- Patel HH, Ludwig LM, Fryer RM, Hsu AK, Warltier DC, Gross GJ: Delta opioid agonists and volatile anesthetics facilitate cardioprotection via potentiation of K<sub>ATP</sub> channel opening. *FASEB J* 2002; 16:1468-70
- Ivanova K, Schaefer M, Drummer C, Gerzer R: Effects of nitric oxide-containing compounds on increases in cytosolic ionized Ca<sup>2+</sup> and on aggregation of human platelets. *Eur J Pharmacol* 1993; 244:37-47
- Pirou V, Ross S, Pigott D, Evans R, Foex P: Beneficial effect of concomitant administration of isoflurane and nicorandil. *Br J Anaesth* 1997; 79:68-77
- National Institutes of Health: Guidelines for the Care and Use of Laboratory Animals. Bethesda, National Institutes of Health, revised 1996. NIH publication No. 85-23
- Uchiyama Y, Otani H, Wakeno M, Okada T, Uchiyama T, Sumida T, Kido M, Imamura H, Nakao S, Shingu K: Role of mitochondrial K<sub>ATP</sub> channels and protein kinase C in ischaemic preconditioning. *Clin Exp Pharmacol Physiol* 2003; 30:426-36
- Garlid KD, Paucek P, Yarov-Yarovsky V, Murray HN, Darbenzio RB,

D'Alonzo AJ, Lodge NJ, Smith MA, Grover GJ: Cardioprotective effect of diazoxide and its interaction with mitochondrial ATP-sensitive  $K^+$  channels: Possible mechanism of cardioprotection. *Circ Res* 1997; 81:1072-82

28. Quasha AL, Eger EI II, Tinker JH: Determination and applications of MAC. *ANESTHESIOLOGY* 1980; 53:315-34

29. Ninomiya H, Otani H, Lu K, Uchiyama T, Kido M, Imamura H: Complementary role of extracellular ATP and adenosine in ischemic preconditioning in the rat heart. *Am J Physiol Heart Circ Physiol* 2002; 282:H1810-20

30. Sato T, O'Rourke B, Marban E: Modulation of mitochondrial ATP-dependent  $K^+$  channels by protein kinase C. *Circ Res* 1998; 83:110-4

31. Kohro S, Hogan QH, Nakae Y, Yamakage M, Bosnjak ZJ: Anesthetic effects on mitochondrial ATP-sensitive K channel. *ANESTHESIOLOGY* 2001; 95:1435-40

32. Roscoe AK, Christensen JD, Lynch C III: Isoflurane, but not halothane, induces protection of human myocardium *via* adenosine  $A_1$  receptors and

adenosine triphosphate-sensitive potassium channels. *ANESTHESIOLOGY* 2000; 92:1692-701

33. Toller WG, Kersten JR, Gross ER, Pagel PS, Warltier DC: Isoflurane preconditions myocardium against infarction *via* activation of inhibitory guanine nucleotide binding proteins. *ANESTHESIOLOGY* 2000; 92:1400-7

34. Ishizawa Y, Pidikiti R, Liebman PA, Eckenhoof RG: G-protein coupled receptors as direct targets of inhaled anesthetics. *Mol Pharmacol* 2002; 61:945-52

35. Kehl F, Shen H, Moreno C, Farber NE, Roman RJ, Kampine JP, Hudetz AG: Isoflurane-induced cerebral hyperemia is partially mediated by nitric oxide and epoxyeicosatrienoic acids in mice *in vivo*. *ANESTHESIOLOGY* 2002; 97:1528-33

36. Zaugg M, Lucchinetti E, Spahn DR, Pasch T, Schaub MC: Volatile anesthetics mimic cardiac preconditioning by priming the activation mitochondrial  $K_{ATP}$  channels *via* multiple signaling pathways. *ANESTHESIOLOGY* 2002; 97:4-14
